# Supplementary material
Source: PubMed Central journal article supplement (PMC9525272)
Supplement: 41418_2022_990_MOESM2_ESM.pdf [file 41418_2022_990_MOESM2_ESM.pdf]

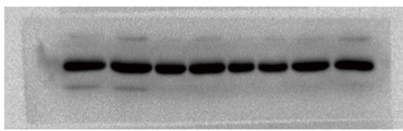

Figure 1a GAPDH

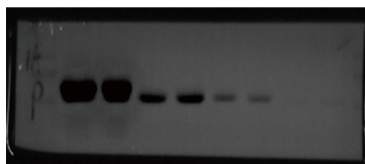

Figure 1a PRMT4

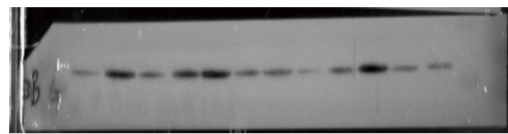

Figure 1d GAPDH

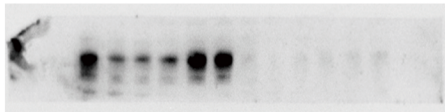

Figure 1d PRMT4

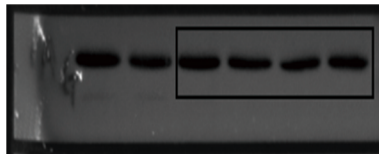

Figure 1f GAPDH

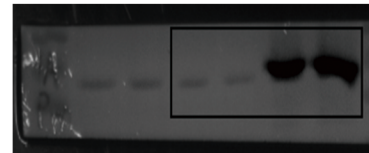

Figure 1f PRMT4

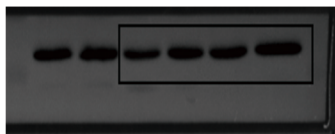

Figure 1h gapdh

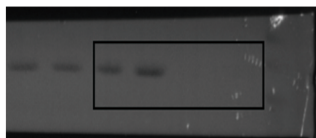

Figure 1h PRMT4

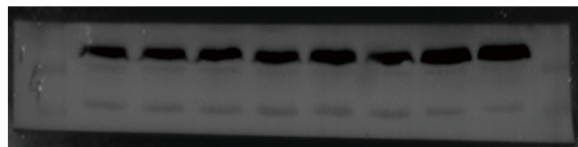

Figure 4e GAPDH

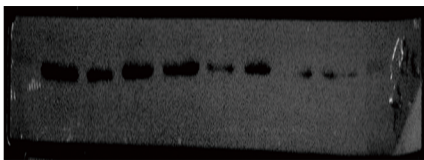

Figure 4e GPX4

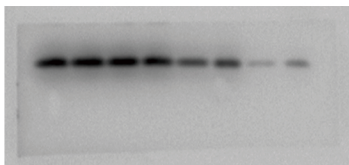

Figure 4e NCOA4

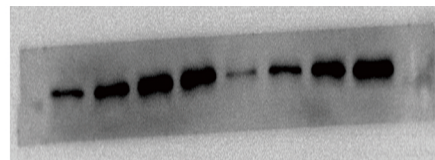

Figure 4e PRMT4

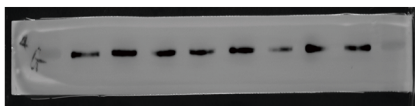

Figure 4f GAPDH

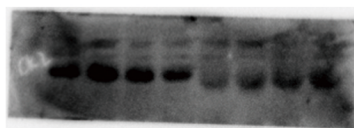

Figure 4f GPX4

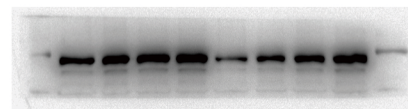

Figure 4f NCOA4

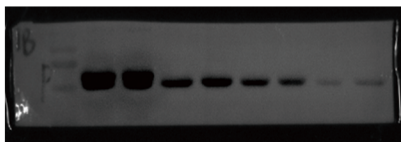

Figure 4f PRMT4

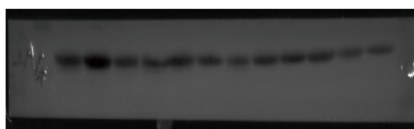

Figure 5f GAPDH

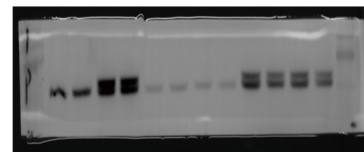

Figure 5f PRMT4

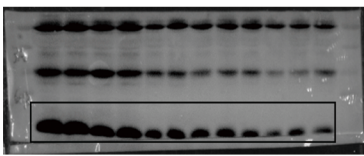

Figure 5f GPX4

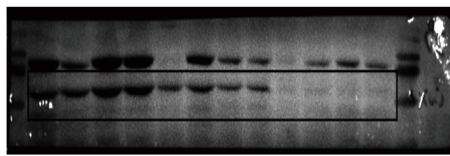

Figure 5f NCOA4

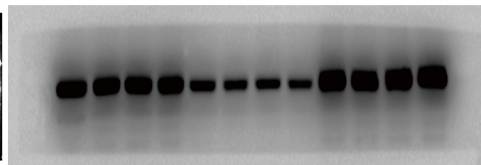

Figure 6f NCOA4

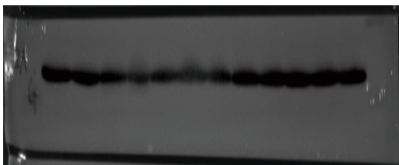

Figure 6f GAPDH

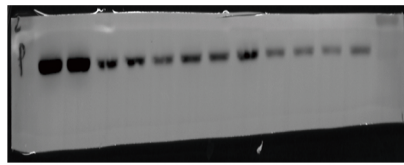

Figure 6f PRMT4

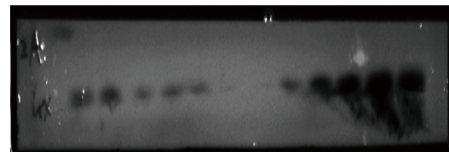

Figure 6f GPX4

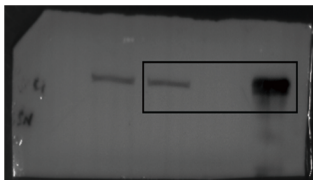

Figure 7a Nrf2

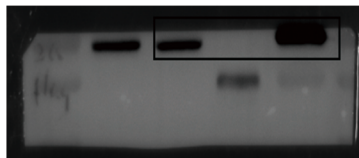

Figure 7a PRMT4

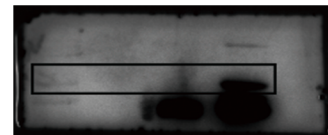

Figure 7b Nrf2

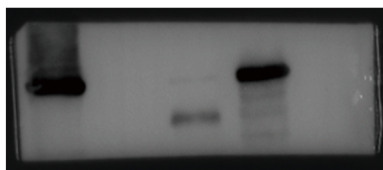

Figure 7b PRMT4

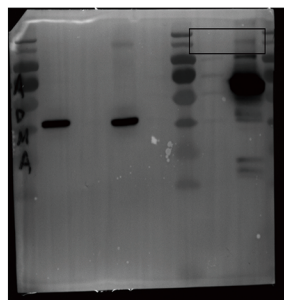

Figure 7c ADMA

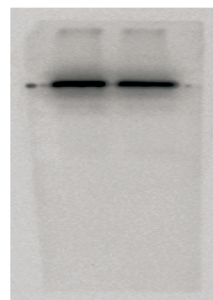

Figure 7c PRMT4

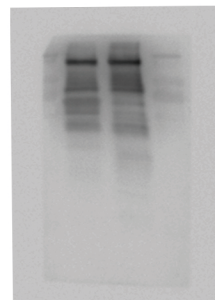

Figure 7c Nrf2

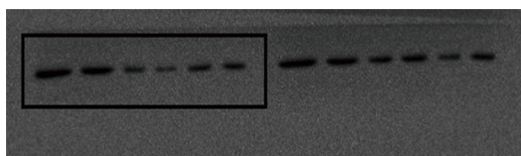

Figure 7d cytosol Nrf2

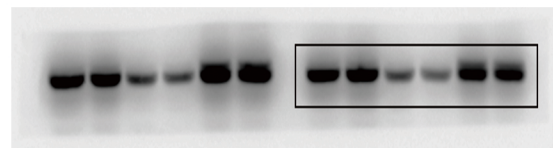

Figure 7d cytosol PRMT4

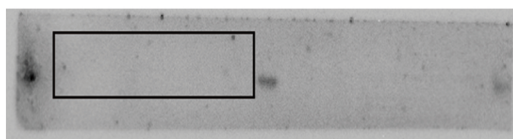

Figure 7d cytosol H3

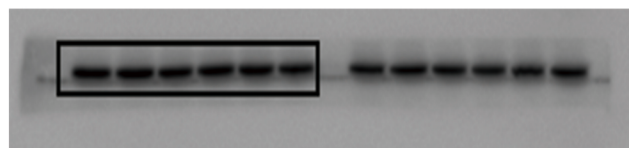

Figure 7d cytosol GAPDH

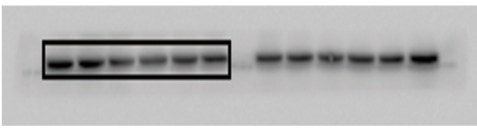

Figure 7d nucleus H3

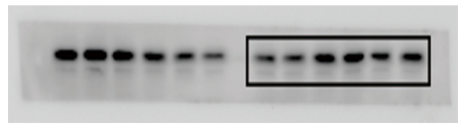

Figure 7d nucleus Nrf2

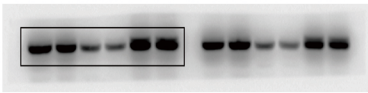

Figure 7d nucleus PRMT4

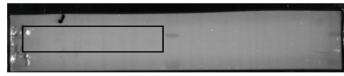

Figure 7d nucleus GAPDH

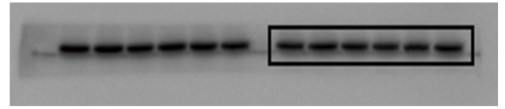

Figure 7e cytosol GAPDH

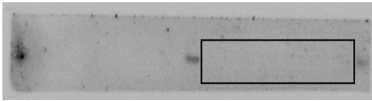

Figure 7e cytosol H3

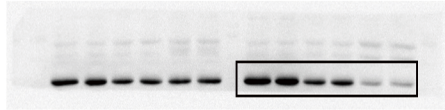

Figure 7e cytosol Nrf2

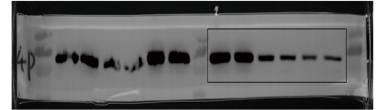

Figure 7e cytosol PRMT4

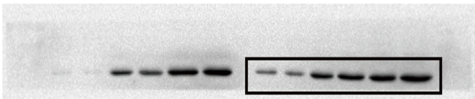

Figure 7e nucleus Nrf2

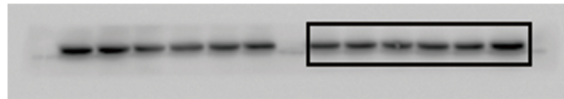

Figure 7e nucleus H3

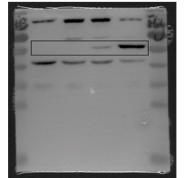

Supplemental fig. S2b  
Fbxo9-Flag

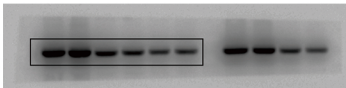

Figure 7e nucleus PRMT4

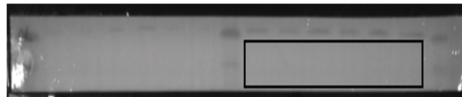

Figure 7e nucleus GAPDH

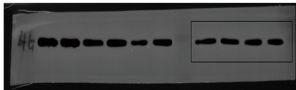

Supplemental fig. S2b  
GAPDH

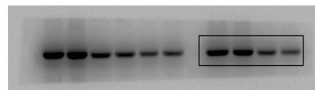

Supplemental fig. S2b  
PRMT4

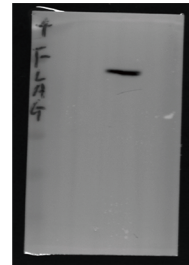

Supplemental fig. S12a  
Flag

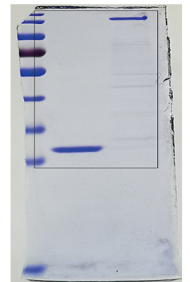

Supplemental fig. S12a  
Commissie Blue staining

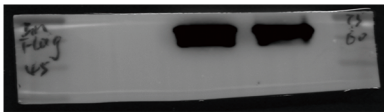

Supplemental fig. S12a input PRMT4-Flag

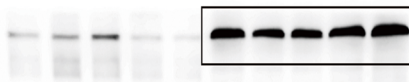

Supplemental Fig. S12b input PRMT4-HA

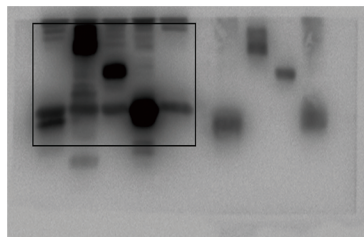

Supplemental fig. S12b  
Flag

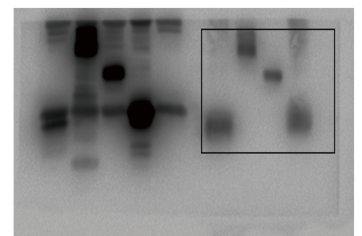

Supplemental fig. S12b  
input Flag

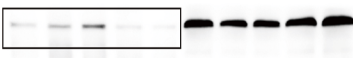

Supplemental Fig. S12b PRMT4-HA

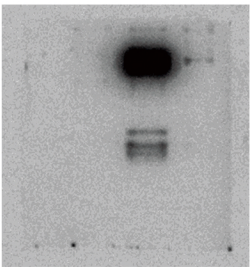

Supplemental fig. S13a ADMA

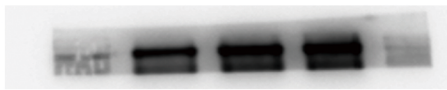

Supplemental fig. S13a Nrf2-GST

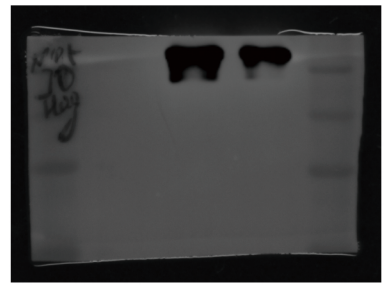

Supplemental fig. S13a PRMT4-Flag

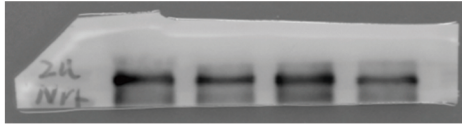

Supplemental fig. S13b Nrf2-GST

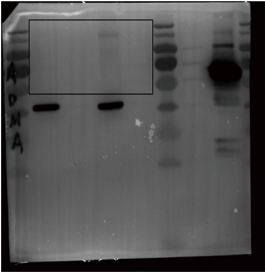

Supplemental fig. S13b ADMA

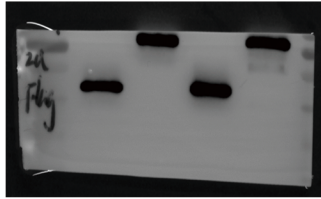

Supplemental fig. S13b Flag

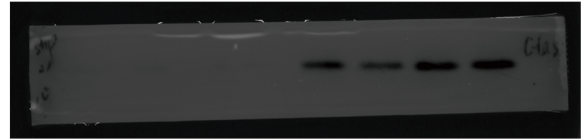

Supplemental fig. S18a c-caspase 3

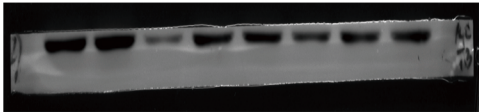

Supplemental fig. S18a  $\beta$ -actin

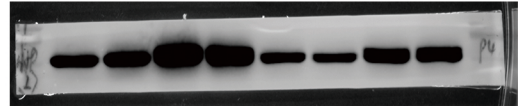

Supplemental fig. S18a PRMT4

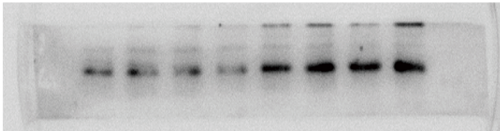

Supplemental fig. S18a Bax

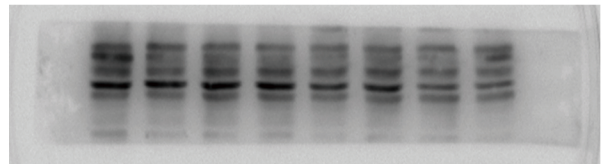

Supplemental fig. S18a Bcl-2

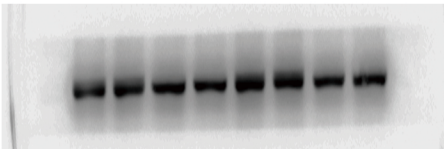

Supplemental fig. S18b Bax

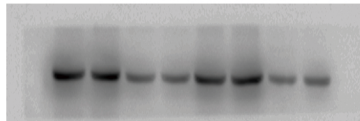

Supplemental fig. S18b PRMT4

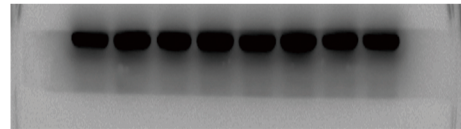

Supplemental fig. S18b  $\beta$ -actin

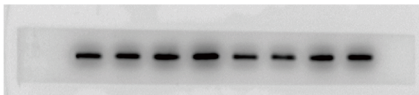

Supplemental fig. S18b bcl-2

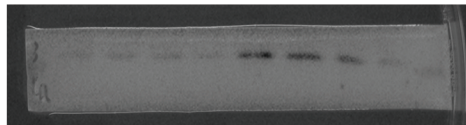

Supplemental fig. S18b c-caspase 3
